# Supplementary material for: High symmetry crystal supramolecularity: –XPh3 molecules in rhombohedral lattices, using multimolecular rather than bimolecular sixfold phenyl embraces
Source: Royal Society of Chemistry journal article supplement (doi:10.1039/b104328p), 2001-11-15
Supplement: b104328p.doc [file b104328p.doc]

# B104328P Electronic Supplementary Information

# High symmetry crystal supramolecularity: -XPh3 molecules in rhombohedral lattices, using multimolecular rather than bimolecular sixfold phenyl embraces

## Ian Dance* and Marcia Scudder

### School of Chemistry, University of New South Wales, Sydney 2052, Australia

### Abstract

Molecules of the type Ph3XYXPh3 commonly crystallise in trigonal and rhombohedral lattices comprised of hexagonal arrays of sixfold phenyl embraces (HA6PE) which are bimolecular concerts of edge-to-face (EF) phenyl•••phenyl interactions. In this paper we describe crystal structures also containing molecules Ph3XYXPh3, also crystallising in the space group R3;– characteristic of the HA6PE lattice, but without the bimolecular (EF)6 form of 6PE. Instead there are multimolecular concerts of EF and offset-face-to-face (OFF) motifs, building up hexagonal layers and in some cases generating high symmetry cavities. These crystals possess the same molecular symmetry as the HA6PE systems, and crystallise in the same space groups, but have different intermolecular motifs: they are effectively crystal supramolecular isomers of the HA6PE lattice. The specific crystalline compounds analysed are Ph3SiOSiPh3•C6H6, Ph3SiNCNSiPh3, and Ph3PNPPh3+[Nb(CO)6]–. The crystal packing in (MePh3P)2[Cu4I6], and in a high symmetry Ni3 complex crystallised with Ph3PO, both in space group R3;–c also characteristic of the HA6PE lattice, are also supramolecular isomers of the HA6PE lattice because the bimolecular motif is (OFF)3 rather than (EF)6. The crystal packing analyses benefit by recognition of the asymmetric sectors of the intermolecular interactions and of cavities, in addition to the conventional asymmetric sectors of the molecular components.

**Fig S1.** There are 30 O•••H–C hydrogen bonds (black and white candystripes) between [Nb(CO)6]– and 8 surrounding Ph3PNPPh3+ in BILNEP10.

**Fig S2**. Side view of the structure of (MePh3P)2 [Cu4I6] [MPPICU]; Cu blue, I purple, methyl C orange (methyl H omitted); space group R3;–c. A puckered hexagon of six MePPh3••Ph3PMe pairs (magenta rods) around a [Cu4I6]2– ion that is twofold disordered by the secondary twofold axes of its 32 site (the eight Cu atoms of the intersecting tetrahedra are evident).
